# Supplementary material for: Using SAR satellite data time series for regional glacier mapping
Source: Copernicus journal article supplement (doi:10.5194/tc-12-867-2018), 2018-03-09
Supplement: Supplementary file 1 [file TC_ReadMeSupplement_Winsvold_et_al_tc-2017-136_final_editorComments_19012018.pdf › supplement_tc-2017-136/TC_ReadMeSupplement_Winsvold_et_al_tc-2017-136_final_editorComments_19012018.pdf]

# Using SAR satellite data time series for regional glacier mapping

Solveig H. Winsvold<sup>1</sup>, Andreas Kääb<sup>1</sup>, Christopher Nuth<sup>1</sup>, Liss M. Andreassen<sup>2</sup>, Ward J.J. van Pelt<sup>3</sup>, and Thomas Schellenberger<sup>1</sup>

<sup>1</sup> Department of Geosciences, University of Oslo, P.O. Box 1047 Blindern, 0316 Oslo, Norway

<sup>2</sup> Section for Glaciers, Ice and Snow, Hydrology Department, Norwegian Water Resources and Energy Directorate, P.O. Box 5091 Majorstua, 0301 Oslo, Norway

<sup>3</sup> Department of Earth Sciences, Uppsala University, Villav. 16, 752 36 Uppsala, Sweden

## Supplementary material to the paper submitted to TC (tc-2017-136)

The supplement consists of two animations of Sentinel-1 backscatter time-series over glaciers:

- 1) TC\_Supl\_Animation\_KNG\_Winsvold\_et\_al\_tc-2017-136.avi
  - a. Sentinel-1 backscatter time-series images from 2015 to 2016 over Kongsvegen, Svalbard. The heatmap shows backscatter values (sigma 0) plotted along a centerline with a spacing of 300 m (y-axis). Time is on the x-axis (12 day repeat). White regions in the heatmap represent missing Sentinel-1 acquisitions.
- 2) TC\_Supl\_Animation\_HELL\_Winsvold\_et\_al\_tc-2017-136.avi
  - a. Sentinel-1 backscatter time-series images from 2014 to 2016 over Hellstugubreen, Norway. The heatmap shows backscatter values (sigma 0) plotted along a centerline with a spacing of 100 m (y-axis). Time is on the x-axis (12 day repeat). White regions in the heatmap represent missing Sentinel-1 acquisitions.
