# Supplementary material for: Using SAR satellite data time series for regional glacier mapping
Source: Copernicus journal article supplement (doi:10.5194/tc-12-867-2018), 2018-03-09
Supplement: Supplementary file [file tc-12-867-2018-supplement-title-page.pdf › tc-12-867-2018-supplement-title-page.pdf]

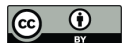

## *Supplement of*

# **Using SAR satellite data time series for regional glacier mapping**

**Solveig H. Winsvold et al.**

*Correspondence to:* Andreas Kääb ([a.m.kaab@geo.uio.no](mailto:a.m.kaab@geo.uio.no))

- [tc-12-867-2018-supplement-title-page.pdf](#)
- [supplement\\_tc-2017-136](#)
  - [TC\\_ReadMeSupplement\\_Winsvold\\_et\\_al\\_tc-2017-136\\_final\\_editorComments\\_19012018.pdf](#)
  - [TC\\_Supl\\_Animation\\_HELL\\_Winsvold\\_et\\_al\\_tc-2017-136.avi](#)
  - [TC\\_Supl\\_Animation\\_KNG\\_Winsvold\\_et\\_al\\_tc-2017-136.avi](#)

The copyright of individual parts of the supplement might differ from the CC BY 4.0 License.
